# Supplementary material
Source: Royal Society of Chemistry journal article supplement (doi:10.1039/d6nj00932h)
Supplement: d6nj00932h1.pdf [file d6nj00932h1.pdf]

## Supporting Information

### **Constructing phosphorus-doped TiO<sub>2</sub> hierarchical nanotube array via a simple route for the enhanced photoelectrochemical water oxidation**

Xuejiao Ma, Qiusheng Wang, Jian Zhao\*

<sup>a</sup> Tianjin Key Laboratory of Organic Solar Cells and Photochemical Conversion, School of Chemistry and Chemical Engineering, Tianjin University of Technology, Tianjin 300384, China.

\*Email: zjtjbd@hotmail.com; zjtjbd@email.tjut.edu.cn

**Table S1.** Preparation of 0.2 M phosphate buffer at 25 °C.

| pH  | Volume of 0.2 M $\text{K}_2\text{HPO}_4$<br>(mL) | Volume of 0.2 M $\text{KH}_2\text{PO}_4$<br>(mL) |
|-----|--------------------------------------------------|--------------------------------------------------|
| 5.8 | 8.5                                              | 91.5                                             |
| 6.0 | 13.2                                             | 86.8                                             |
| 6.2 | 19.2                                             | 80.8                                             |
| 6.4 | 27.8                                             | 72.2                                             |
| 6.6 | 38.1                                             | 61.9                                             |
| 6.8 | 49.7                                             | 50.3                                             |
| 7.0 | 61.5                                             | 38.5                                             |
| 7.2 | 71.7                                             | 28.3                                             |
| 7.4 | 80.2                                             | 19.8                                             |
| 7.6 | 86.6                                             | 13.4                                             |
| 7.8 | 90.8                                             | 9.2                                              |
| 8.0 | 94.0                                             | 6.0                                              |
| 9.0 | 100.0                                            | 0.0                                              |

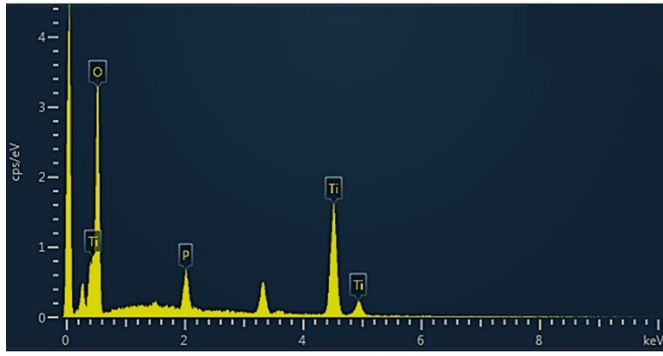

**Figure S1.** The EDS mapping analysis of P-TiO<sub>2</sub> HNTAs.

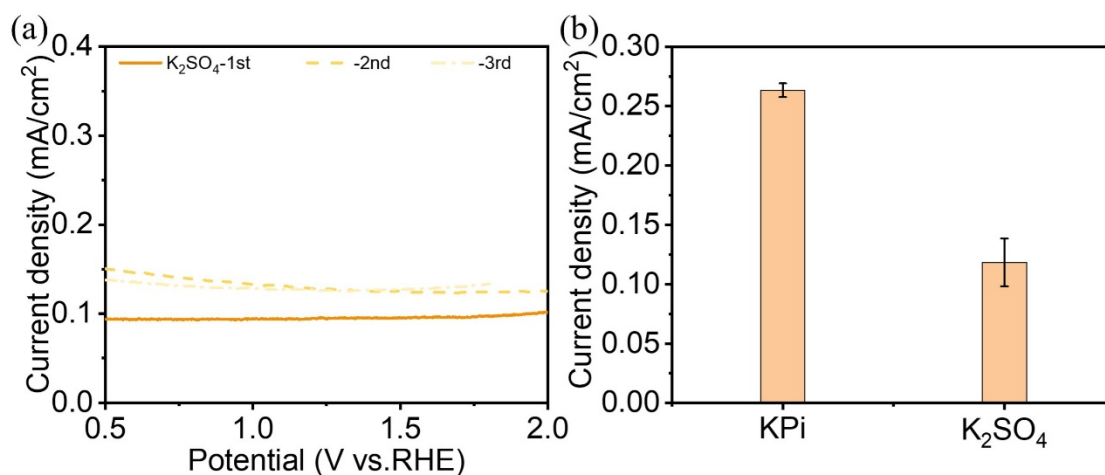

**Figure S2.** (a) The PEC water oxidation activity (LSV curve) of K-doped TiO<sub>2</sub> HNTAs obtained by immersing in K<sub>2</sub>SO<sub>4</sub> instead of KPi, (b) The comparison of current density at 1.23 V vs. RHE with error bars for TiO<sub>2</sub> HNTAs obtained by immersing in K<sub>2</sub>SO<sub>4</sub> and KPi as precursor. The error bar was obtained by repeating the experiment for three times (1<sup>st</sup>, 2<sup>nd</sup>, 3<sup>rd</sup>). [Reaction condition: 0.5 M NaSO<sub>4</sub>, Xenon lamp (AM 1.5G, 150 mW/cm<sup>2</sup>), scan rate 20 mV/s.]

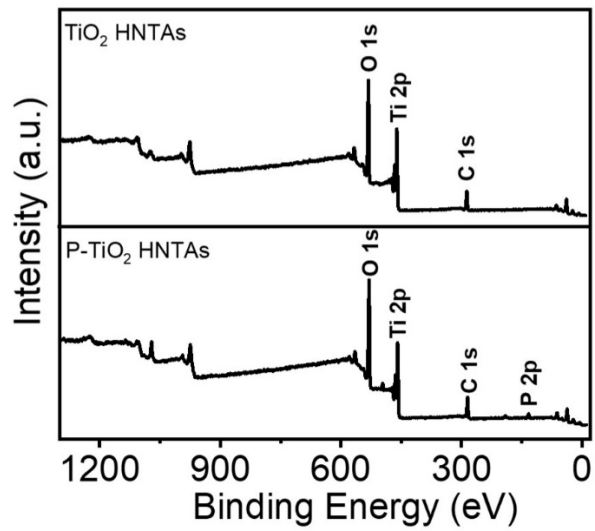

**Figure S3.** The full XPS spectrum of P- $\text{TiO}_2$  HNTAs.

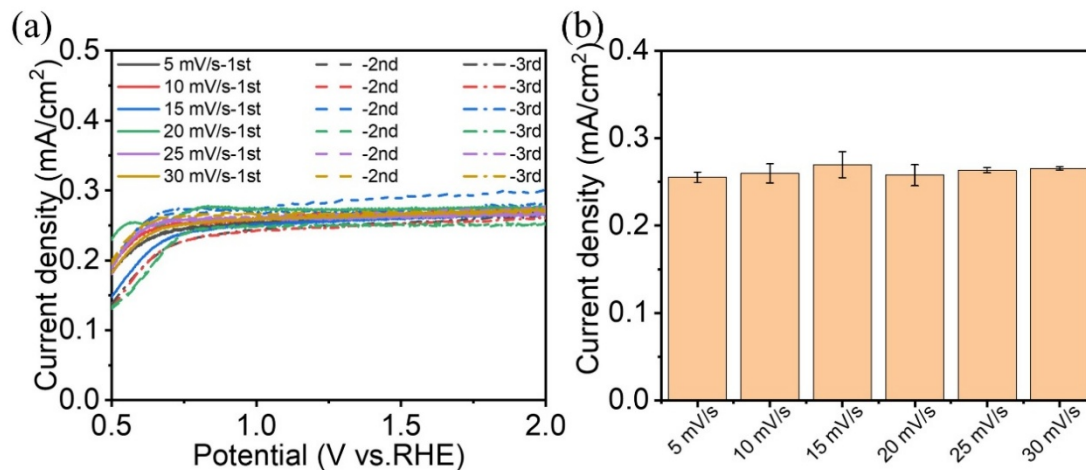

**Figure S4.** (a) The influence of scanning rate on the PEC water oxidation activity (LSV curves) of P-TiO<sub>2</sub> HNTAs. (b) The corresponding current density at 1.23 V vs. RHE. The error bars were obtained by repeating the experiment three times. [Reaction conditions: 0.5 M Na<sub>2</sub>SO<sub>4</sub>, Xenon lamp (AM 1.5G, 150 mW/cm<sup>2</sup>).]

The scanning rate may lead to a significant overestimation of the photocurrent due to the charging current of the capacitor and the non-steady-state behavior. Therefore, to verify the optimized scan rate, we firstly conducted LSV tests at scanning rates of 5 mV/s, 10 mV/s, 15 mV/s, 20 mV/s, 25 mV/s, and 30 mV/s, respectively. As shown in Figure S4, as the scanning rate increases, the current density increases slightly, within the error range. Thus, a scan rate of 20 mV/s was chosen for the following investigation.

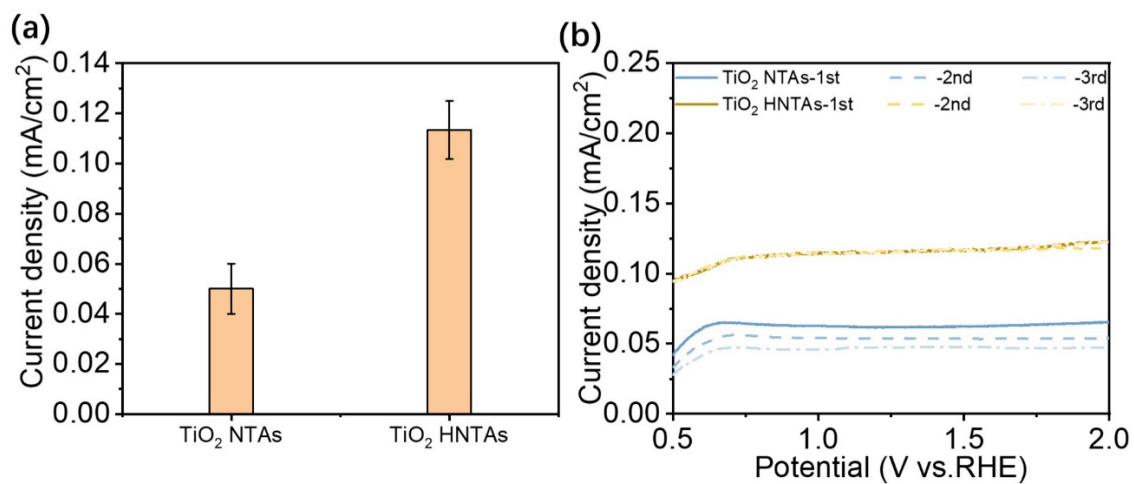

**Figure S5.** The performance of TiO<sub>2</sub> NTAs and TiO<sub>2</sub> HNTAs for PEC water oxidation. (a) The LSV curves and (b) corresponding current density at 1.23 V vs. RHE with error bars, obtained by repeating the experiments for three times (1<sup>st</sup>, 2<sup>nd</sup>, 3<sup>rd</sup>). [Reaction condition: 0.5 M NaSO<sub>4</sub>, Xenon lamp (AM 1.5G, 150 mW/cm<sup>2</sup>), scan rate 20 mV/s.]

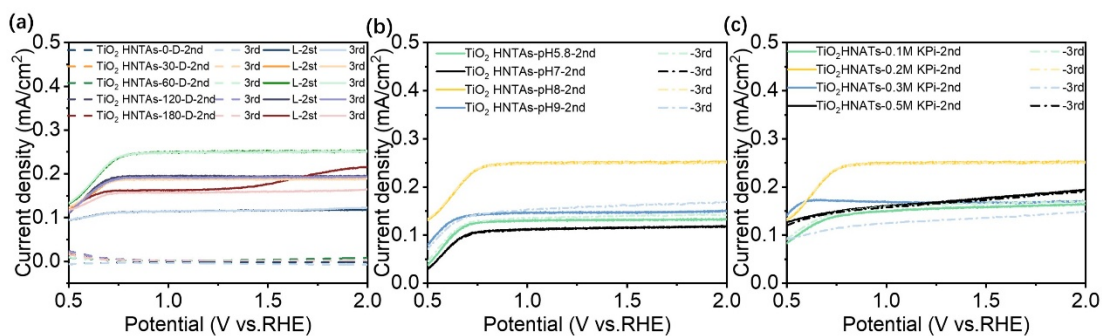

**Figure S6.** The PEC water oxidation activity (LSV curves) of TiO<sub>2</sub> HNTAs and P-doping TiO<sub>2</sub> HNTAs samples obtained via (a) different impregnation times, (b) pH and (c) concentration of KPi precursor, repeating the experiment for the 2<sup>nd</sup> and 3<sup>rd</sup> times. [Reaction condition: 0.5 M NaSO<sub>4</sub>, Xenon lamp (AM 1.5G, 150 mW/cm<sup>2</sup>), scan rate 20 mV/s.]

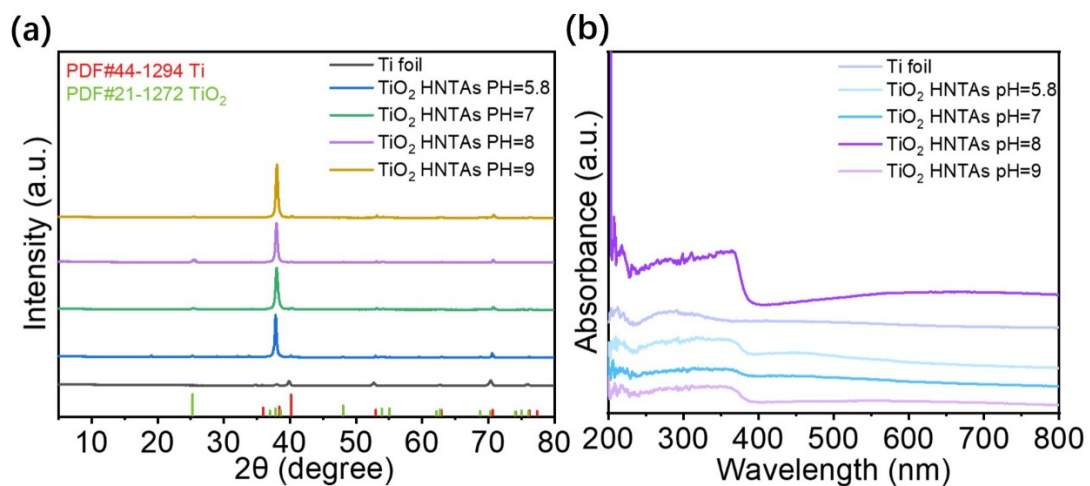

**Figure S7.** The (a) XRD and (b) UV-Vis absorption spectra of P-doping TiO<sub>2</sub> HNTAs samples prepared at different pH of KPi precursor.

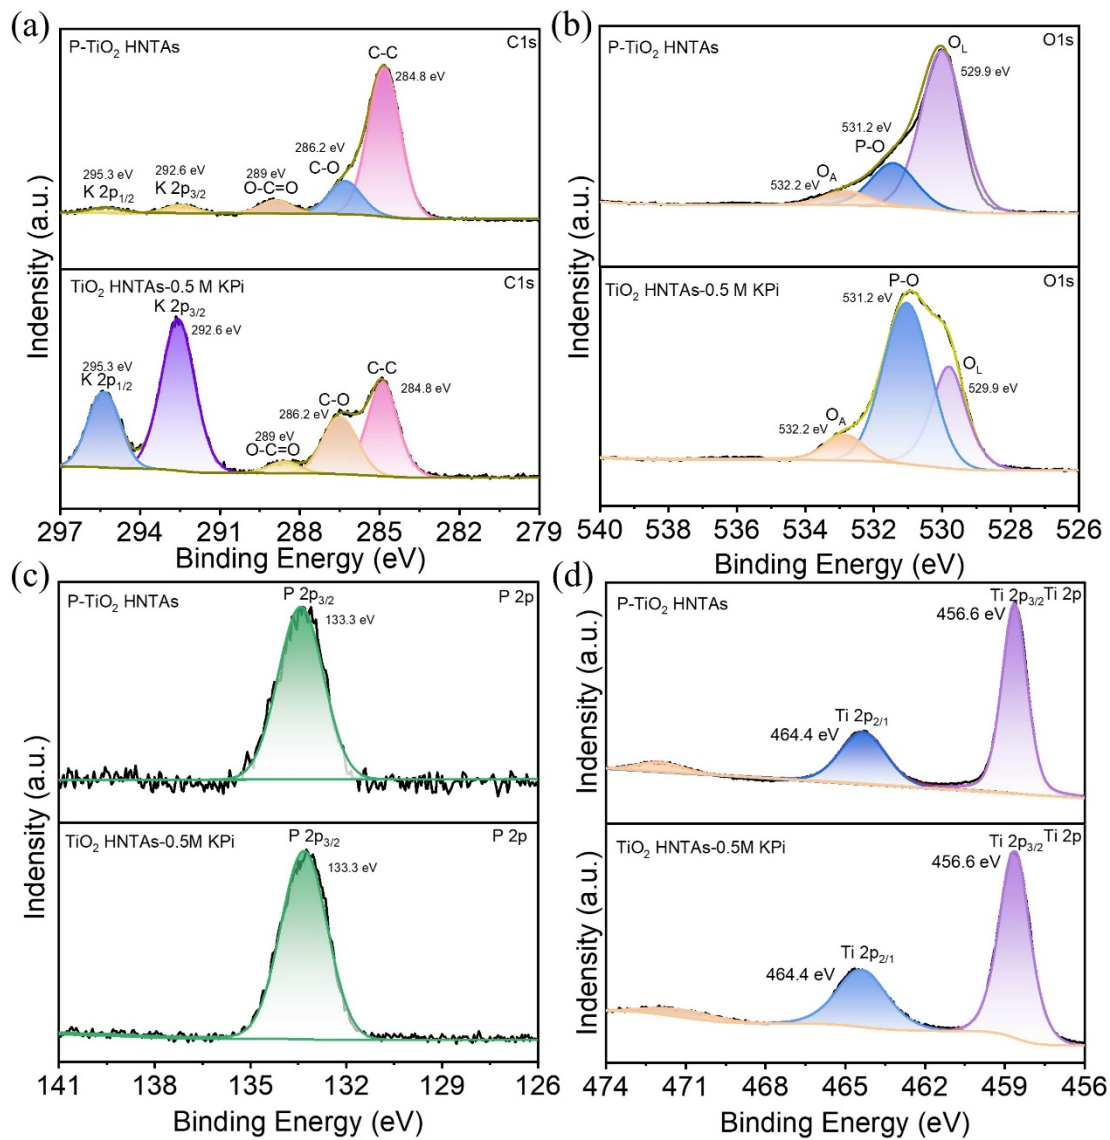

**Figure S8.** The comparison of XPS analysis for P-TiO<sub>2</sub> HNTAs and the sample dipped in high concentration KPi (TiO<sub>2</sub> HNTAs-0.5 M KPi). (a) O 1s, (b) Ti 2p (c) P 2p and (d) C 1s.

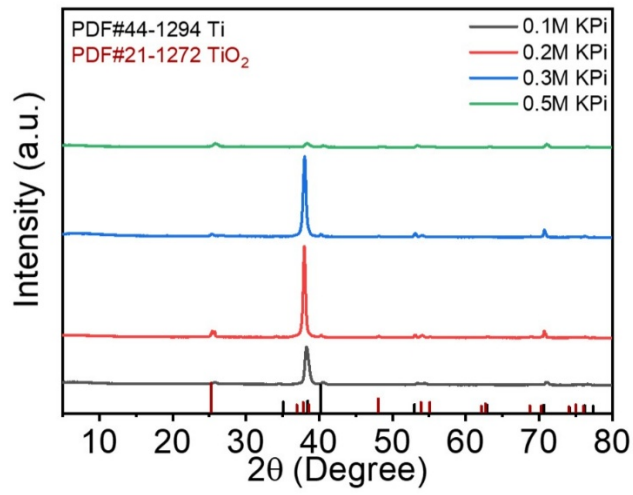

**Figure S9.** The XRD patterns of the P-doping TiO<sub>2</sub> HNTAs samples prepared by dipping in different concentration of KPi precursor.

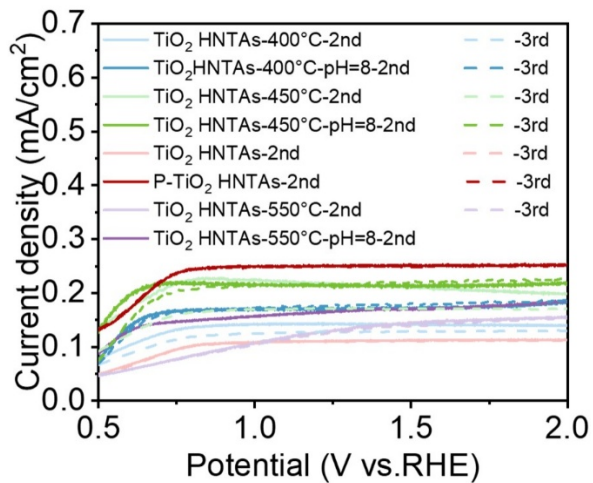

**Figure S10.** The PEC water oxidation activity (LSV curves) of TiO<sub>2</sub> HNTAs and P-doping TiO<sub>2</sub> HNTAs samples obtained by annealing at different temperatures. [Reaction condition: 0.5 M NaSO<sub>4</sub>, Xenon lamp (AM 1.5G, 150 mW/cm<sup>2</sup>), scan rate 20 mV/s.]

**Table S2.** The summary of XRD analysis for TiO<sub>2</sub> HNTAs, P-doping TiO<sub>2</sub> HNTAs samples obtained under different calcination temperatures

| Catalyst                         | Annealing temperature | Peak area ratio of (004)/(101) |
|----------------------------------|-----------------------|--------------------------------|
| TiO <sub>2</sub> HNTAs           | 400 °C                | 95322/41029=2.32               |
| P-doping TiO <sub>2</sub> HNTAs  |                       | 165748/21326=7.77              |
| TiO <sub>2</sub> HNTAs           | 450 °C                | 199303/66700=2.98              |
| P-doping TiO <sub>2</sub> HNTAs- |                       | 264869/34405=7.70              |
| TiO <sub>2</sub> HNTAs-          | 500 °C                | 97560/24851=3.92               |
| P-doping TiO <sub>2</sub> HNTAs  |                       | 231572/30763=7.53              |
| TiO <sub>2</sub> HNTAs-          | 550 °C                | 161430/61828=2.61              |
| P-doping TiO <sub>2</sub> HNTAs  |                       | 132383/37495=3.53              |

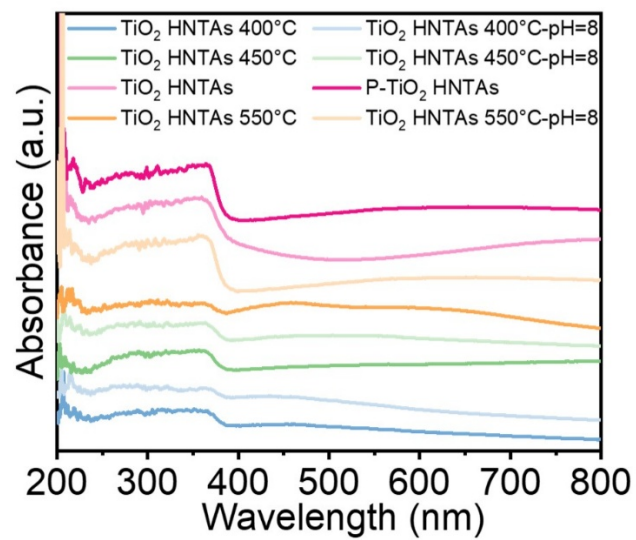

**Figure S11.** The UV-Vis absorption spectra TiO<sub>2</sub> HNTAs and P-doping TiO<sub>2</sub> HNTAs obtained by annealing at different temperatures.

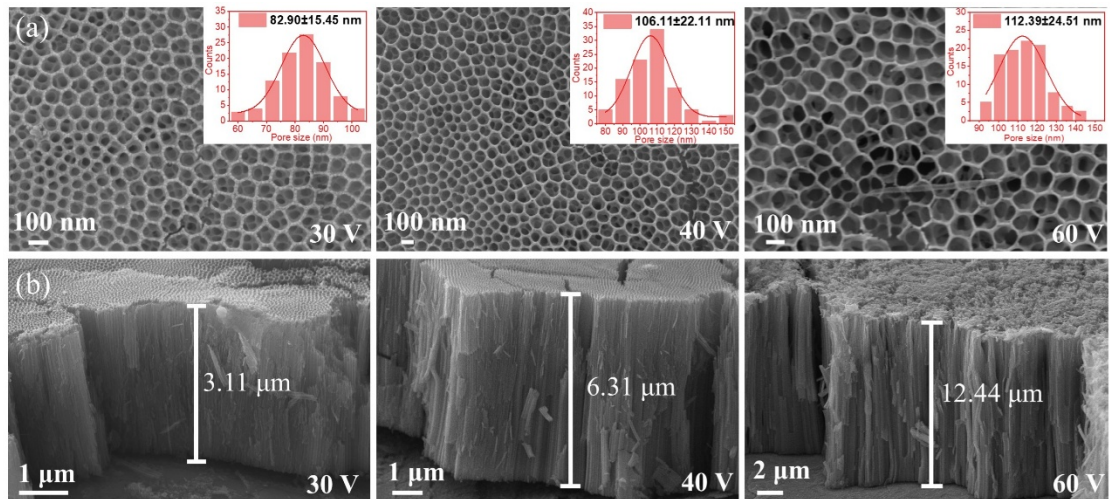

**Figure S12** (a) The SEM and pore size distribution and (b) cross-section SEM images for the P-doping TiO<sub>2</sub> HNTAs samples obtained at different anodization voltages (30 V, 40 V and 60 V, the data for 50 V has been provided before).

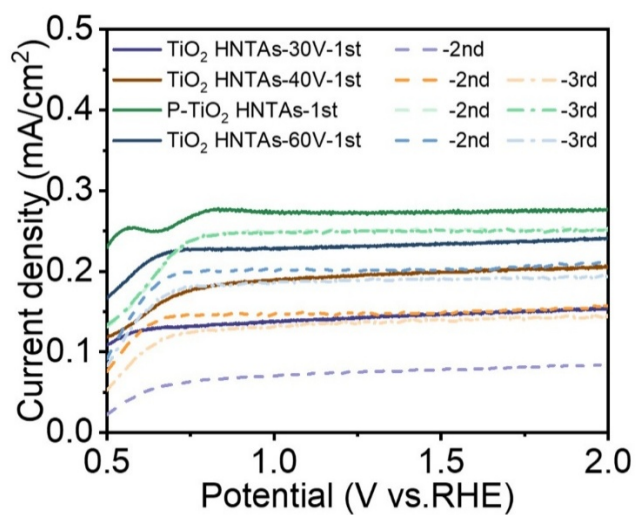

**Figure S13.** The PEC water oxidation activity (LSV curves) of P-doping TiO<sub>2</sub> HNTAs samples obtained by annealing at different temperatures. [Reaction condition: 0.5 M Na<sub>2</sub>SO<sub>4</sub>, Xenon lamp (AM 1.5G, 150 mW/cm<sup>2</sup>), scan rate 20 mV/s.]

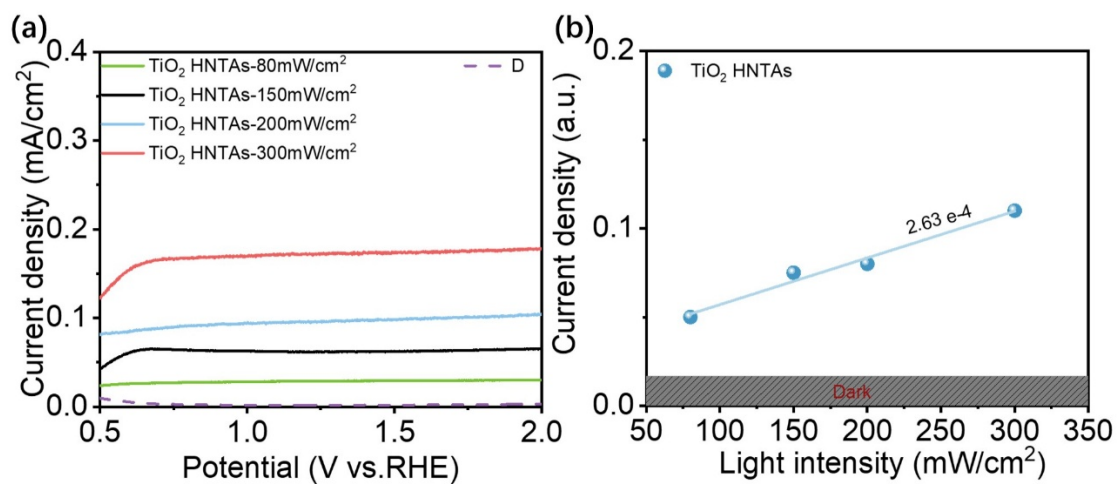

**Figure S14.** (a) LSV curves of TiO<sub>2</sub> HNTAs under different light intensities and (b) the linear relationship of pure photocurrent density (subtracting the current density in the dark) at 1.23 V vs. RHE with light intensity. [Reaction condition: 0.5 M Na<sub>2</sub>SO<sub>4</sub>, Xenon lamp (AM 1.5G, 80-300 mW/cm<sup>2</sup>), scan rate 20 mV/s.]

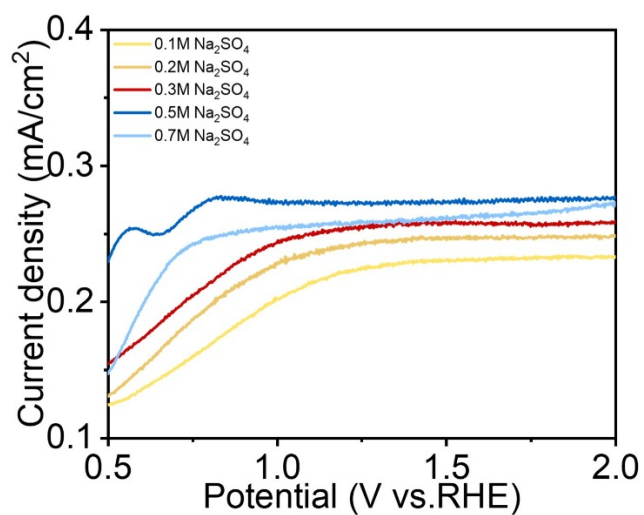

**Figure S15.** The LSV curves of PEC water oxidation in different concentration of Na<sub>2</sub>SO<sub>4</sub> electrolyte with P-TiO<sub>2</sub> HNTAs as catalyst. [Reaction condition: Na<sub>2</sub>SO<sub>4</sub>, Xenon lamp (AM 1.5G, 150 mW/cm<sup>2</sup>), scan rate 20 mV/s.]

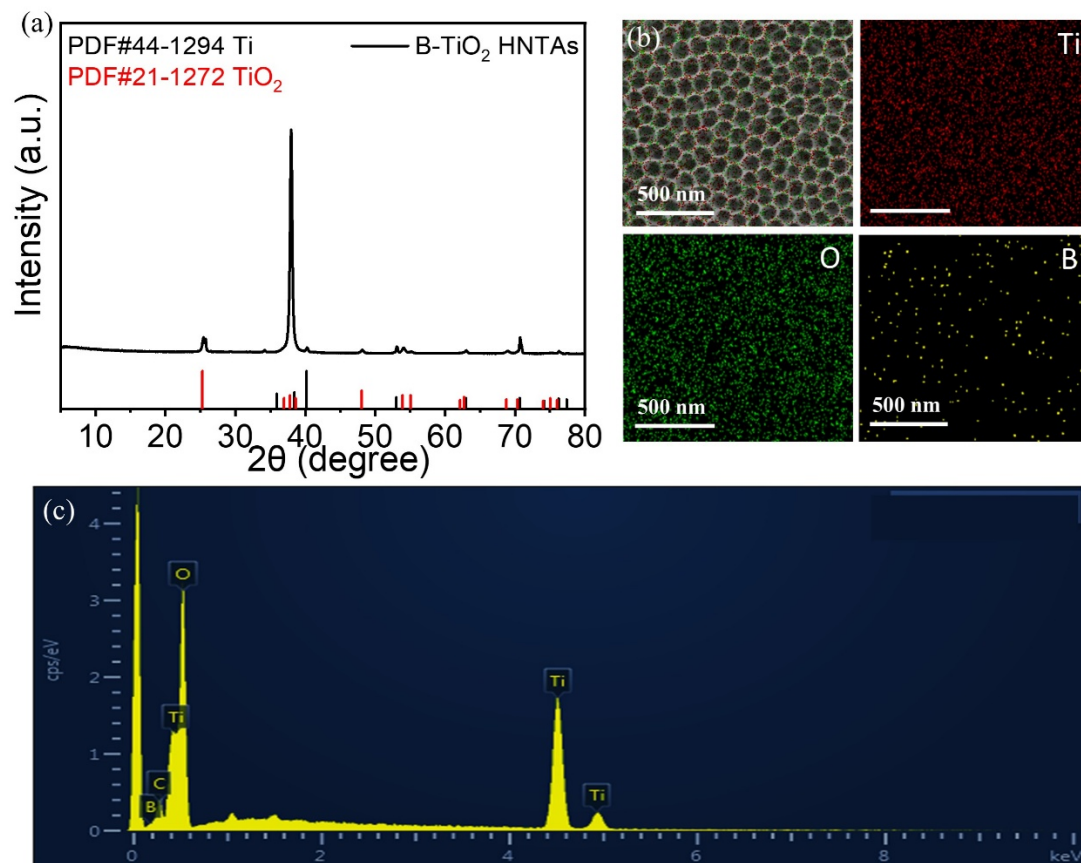

**Figure S16.** The (a) XRD, (b) SEM and the corresponding EDS elemental mapping as well as the (c) mapping analysis of B-TiO<sub>2</sub> HNTAs.

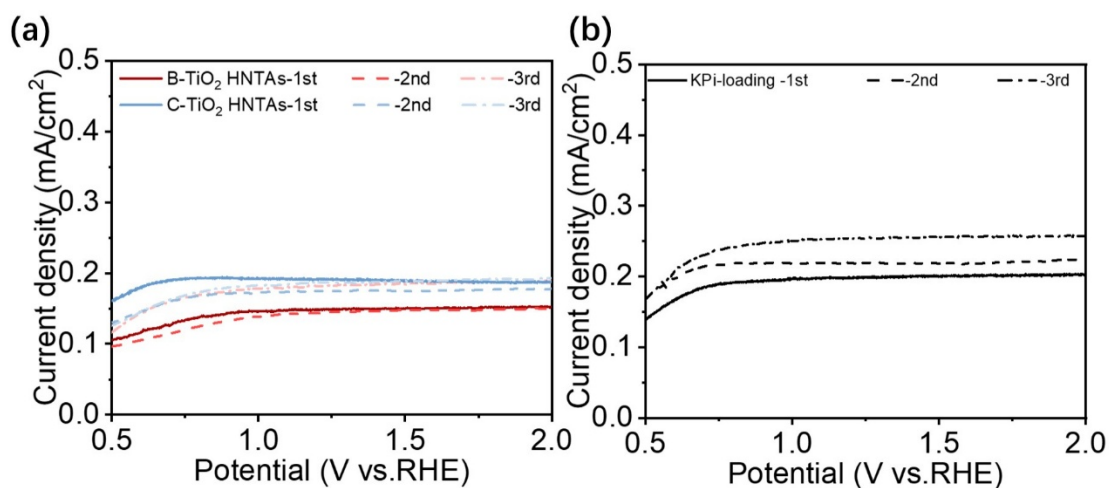

**Figure S17.** The LSV curves of (a) the samples prepared by using borate and carbonate instead of phosphate and (b) the sample prepared by annealing first followed by dipping in KPi. [Reaction condition: 0.5 M NaSO<sub>4</sub>, Xenon lamp (AM 1,5G, 150 mW/cm<sup>2</sup>), scan rate 20 mV/s.]

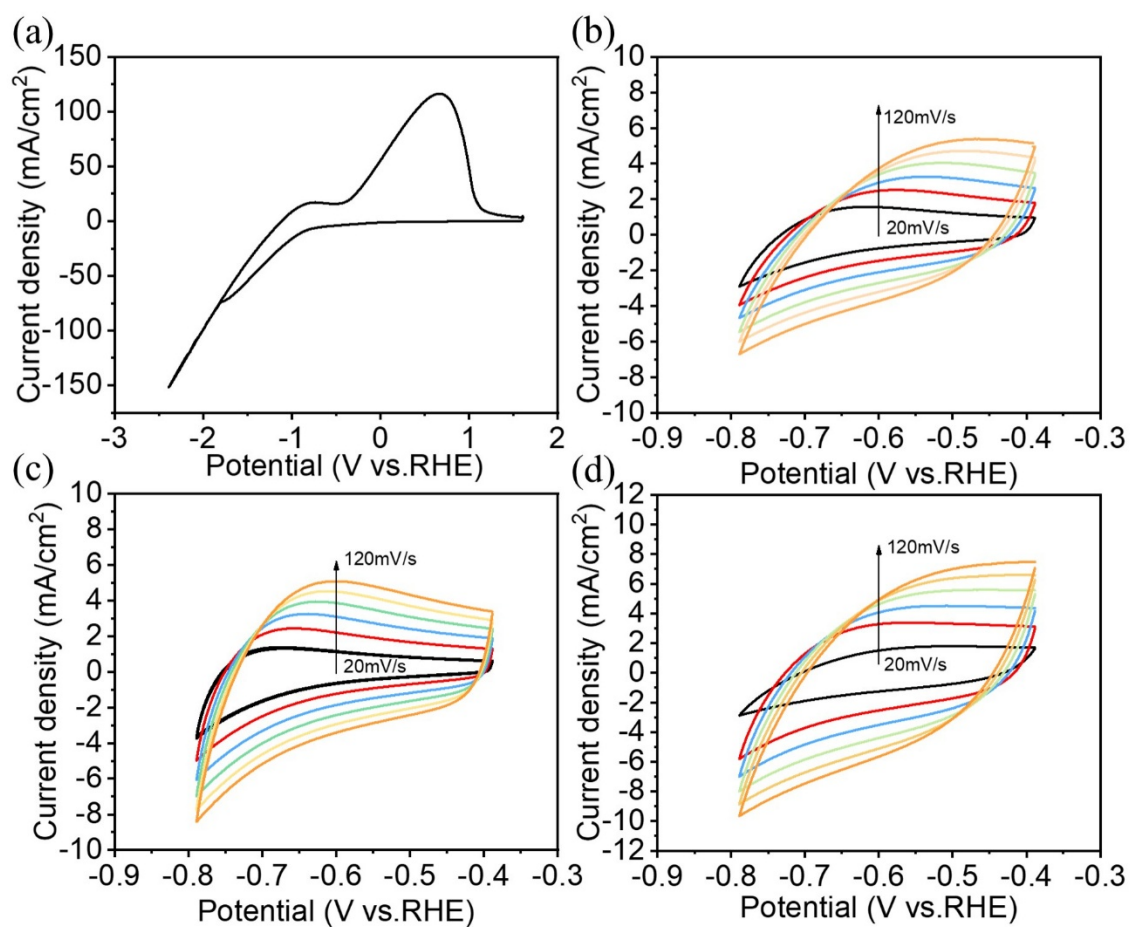

**Figure S18.** (a) The wide range cyclic voltammetry curve of P-TiO<sub>2</sub> HNTAs tested in 0.5 M NaSO<sub>4</sub> with a scan rate of 100 mV/s and the corresponding CV with different scan rates in non-faradaic zone for (b) TiO<sub>2</sub> NTAs, (c) TiO<sub>2</sub> HNTAs and (d) P-TiO<sub>2</sub> HNTAs.

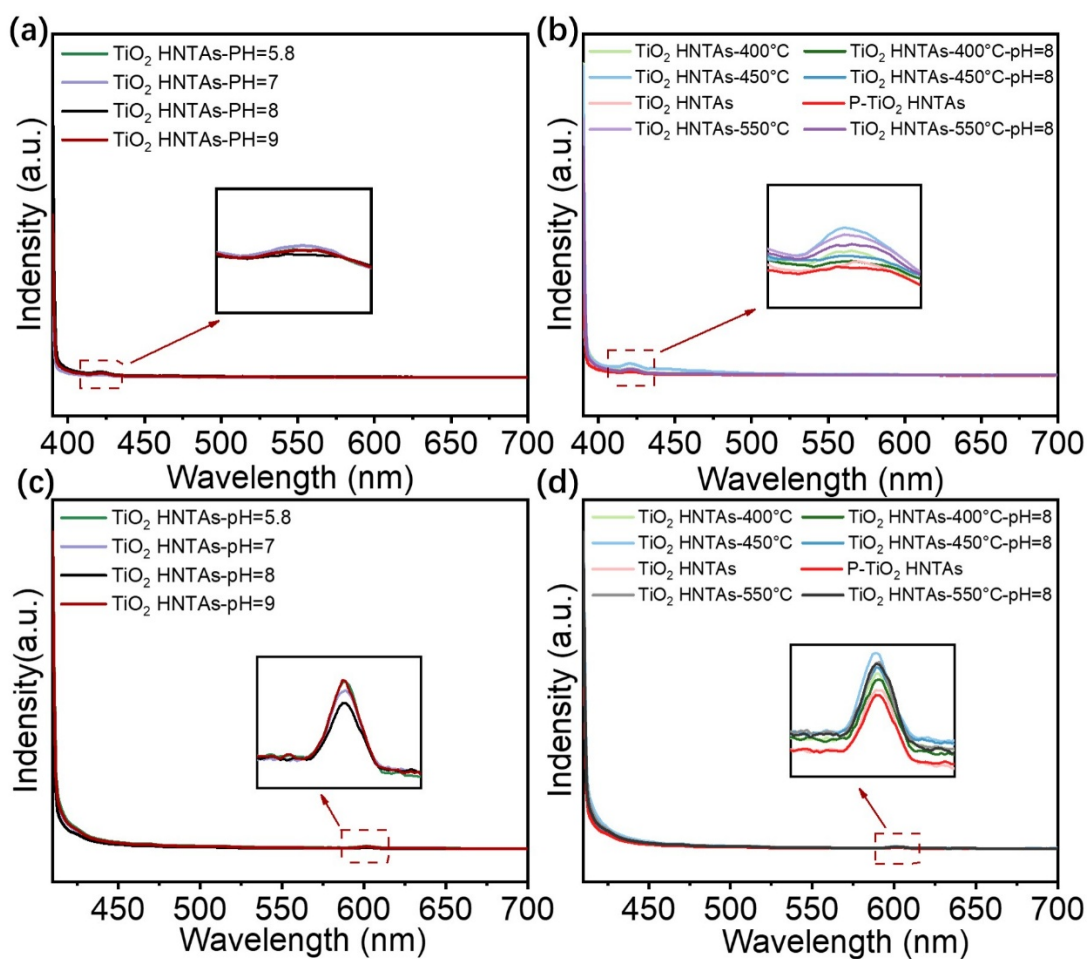

**Figure S19.** PL of P-TiO<sub>2</sub> HNTAs samples prepared by using (a) different pH of KPi (b) different calcination temperatures. [Excitation wavelength 380 nm]. PL of P-TiO<sub>2</sub> HNTAs samples prepared by using (c) different pH of KPi (d) different calcination temperatures. [Excitation wavelength 400 nm]

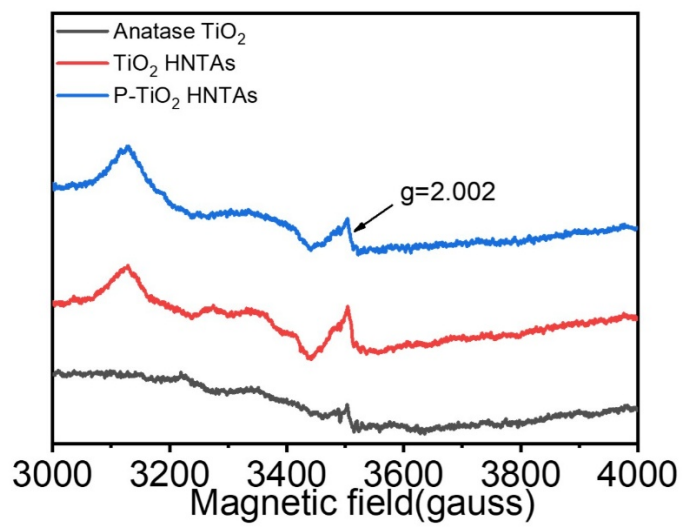

**Figure S20.** The EPR spectra of commercial anatase-TiO<sub>2</sub>, prepared TiO<sub>2</sub> HNTAs and P-TiO<sub>2</sub> HNTAs.

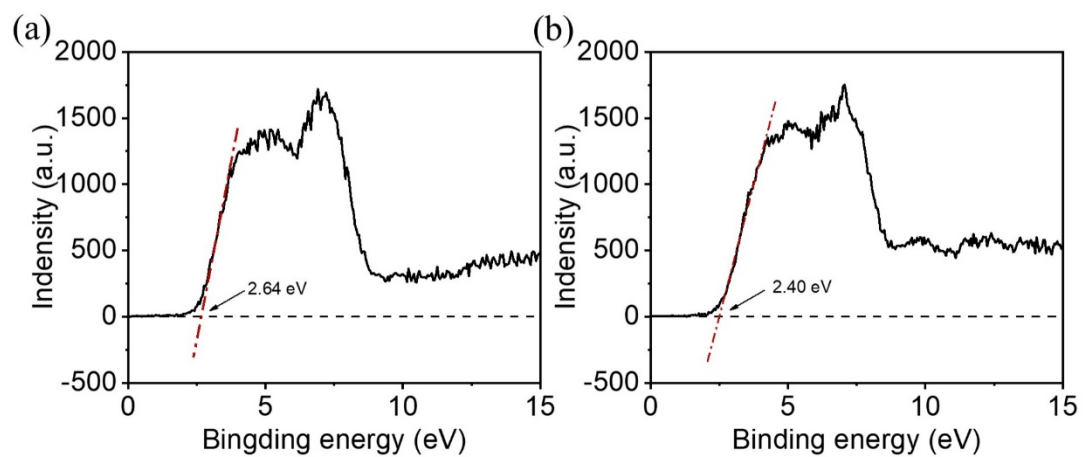

**Figure S21.** The XPS valence band spectrum of (a) TiO<sub>2</sub> HNTAs and (b) P-TiO<sub>2</sub> HNTAs powder.

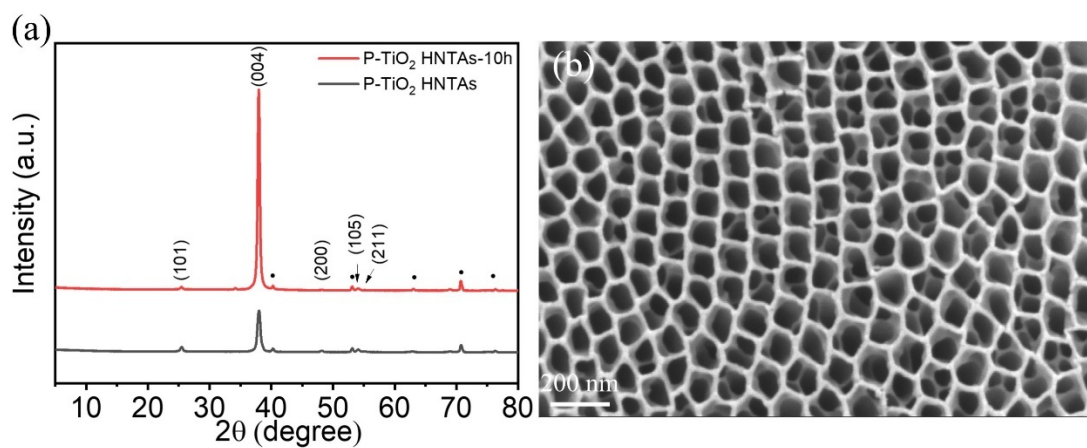

**Figure S22.** (a) The XRD pattern of the sample, \* indicates the peak of the titanium foil substrate and (b) SEM image of P-TiO<sub>2</sub> HNTAs recycled after photostability test for 10 h.

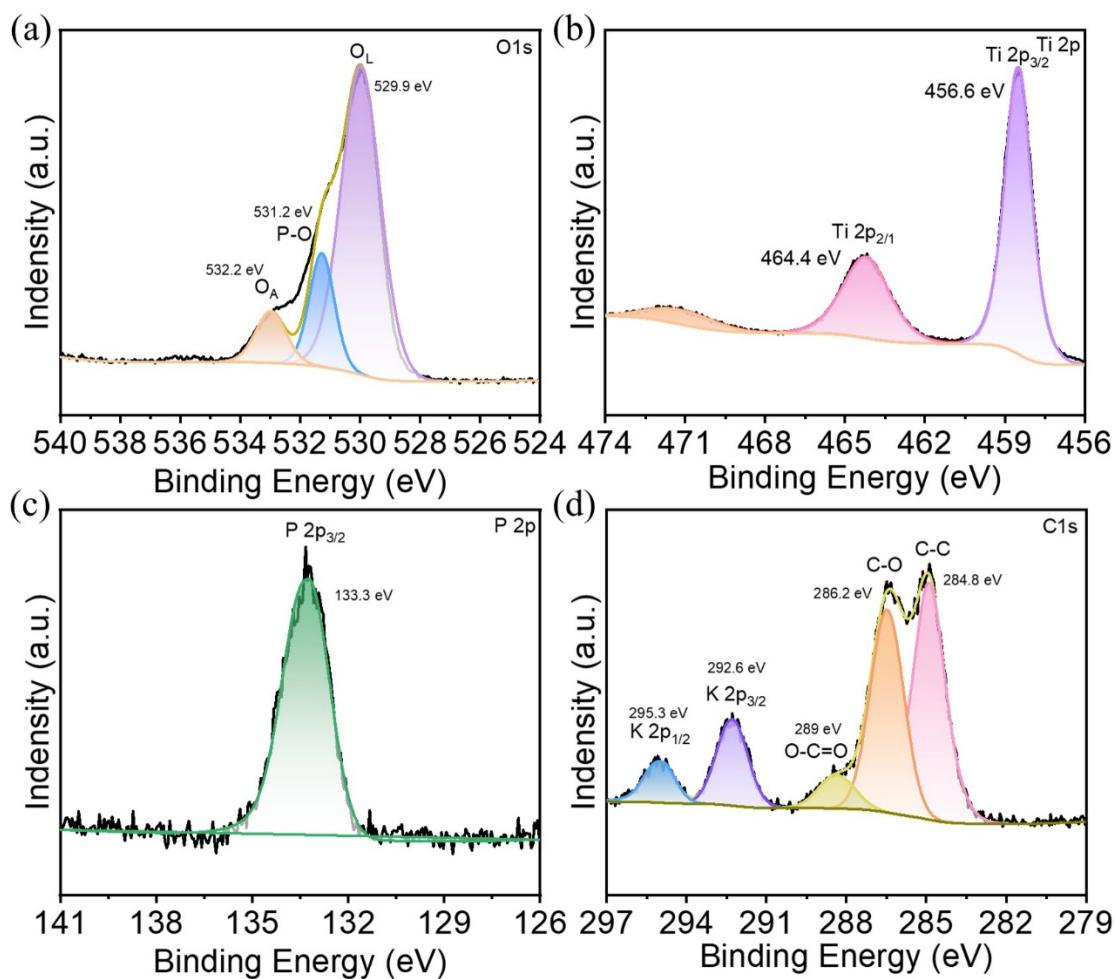

**Figure S23.** The XPS analysis of P-TiO<sub>2</sub> HNTAs after photostability test for 10 h. (a) O 1s, (b) Ti 2p, (c) P 2p and (d) C 1s.

**Table S3.** Compared the performance of P-TiO<sub>2</sub> HNTAs with the catalysts reported in literatures on PEC water oxidation.

| Catalyst                                               | Wavelength and intensity of light                 | Electrolyte concentration             | The current density at 1.23 V vs. RHE | Ref       |
|--------------------------------------------------------|---------------------------------------------------|---------------------------------------|---------------------------------------|-----------|
| P-TiO <sub>2</sub> NTs                                 | $\lambda > 420\text{nm}$ , 100 mW/cm <sup>2</sup> | 1.0 M NaOH                            | 0.24 mA/cm <sup>2</sup>               | 1         |
| N-doped TiO <sub>2</sub>                               | $\lambda > 420\text{nm}$ , 100 mW/cm <sup>2</sup> | 1.0 M NaOH                            | 0.2 mA/cm <sup>2</sup>                | 2         |
| CoPi/N-TNA                                             | $\lambda = 460\text{nm}$ , 100 mW/cm <sup>2</sup> | 0.2 M K <sub>3</sub> PO <sub>4</sub>  | 0.1 mA/cm <sup>2</sup>                | 3         |
| FTO/TiO <sub>2</sub> /Si/NiO                           | AM1.5G, 100 mW/cm <sup>2</sup>                    | 1.0 M KOH                             | 0.65 mA/cm <sup>2</sup>               | 4         |
| CoAl(OH) <sub>x</sub> /citrate/Sb-TiO <sub>2</sub> NRs | AM1.5G, 150 mW/cm <sup>2</sup>                    | 0.5 M Na <sub>2</sub> SO <sub>4</sub> | 1.78 mA/cm <sup>2</sup>               | 5         |
| $\alpha$ -SnWO <sub>4</sub>                            | AM1.5G, 100 mW/cm <sup>2</sup>                    | 0.1 M KPi                             | 1.9 mA/cm <sup>2</sup>                | 6         |
| 3D Fe <sub>2</sub> O <sub>3</sub> /Ni NC               | AM1.5G, 100 mW/cm <sup>2</sup>                    | 1 M NaOH                              | 1.86 mA/cm <sup>2</sup>               | 7         |
| P-TiO <sub>2</sub> HNTAs                               | AM1.5G, 150 mW/cm <sup>2</sup>                    | 0.5 M Na <sub>2</sub> SO <sub>4</sub> | 0.28 mA/cm <sup>2</sup>               | This work |

[1] D.D. Qin, Q.H. Wang, J. Chen, C.H. He, Y. Li, C.H. Wang, J.J. Quan, C.L. Tao and X.Q. Lu, *Sustainable Energy Fuels.*, 2017, **1**, 248–253.

[2] M. Praveen Kumar, R. Jagannathan and S. Ravichandran, *Energy Fuels*, 2020, **34**, 9030–9036.

[3] U. Kang, R. Mizuochi, H. Park and K. Maeda, *Small Struct.*, 2023, **4**, 2200229.

[4] K. Shubham, M. K. Ganesha, H. Hakkeem, A. M. Chandran, A. S. Mary, A. Anand, D. De, D. Sarkar, G. G. Khan and A. K. Singh, *J. Mater. Chem. A*, 2025, **13**, 10844–10854.

[5] D. Pal, D. Maity, D. De, M. K. Ganesha, A. K. Singh, S. Bhaladhare and G. G. Khan, *Int. J. Hydrogen Energy*, 2024, **51**, 52–65.

[6] A. Anand, A. Raj, D. Mondal, D. Maity, M. K. Ganesha, A. K. Singh, D. De and G. G. Khan, *Adv. Funct. Mater.*, 2025, **35**, 2417398.

[7] A. K. Singh and D. Sarkar, *ChemCatChem*, 2019, **11**, 6355–6363.
